# Supplementary material for: Design and synthesis of functionalized defective MOFs for catalytic conversion of CO2 to cyclic carbonates under green conditions
Source: Royal Society of Chemistry journal article supplement (doi:10.1039/d3ce00878a), 2023-01-01
Supplement: d3ce00878a1.pdf [file d3ce00878a1.pdf]

## Supporting information

### Design and synthesis of functionalized defective MOFs for catalytic conversion of CO<sub>2</sub> to cyclic carbonates under green conditions

|                                                            |   |
|------------------------------------------------------------|---|
| S1 Reagents .....                                          | 1 |
| S2 Synthesis of 2-(imidazole-1-yl) terephthalic acid ..... | 1 |
| S3 Calculation of activation energy .....                  | 3 |
| Reference.....                                             | 7 |

#### S1 Reagents

Hafnium chloride (HfCl<sub>4</sub>), N, N-dimethylformamide (DMF), acetone, toluene, N-methylpyrrolidone (NMP), deionized water (DI), formic acid (HCOOH), acetic acid (HAc), benzoic acid (BA), trifluoroacetic acid (TFA), ethanol (EA), epichlorohydrin (ECH), epibromohydrin (EBH), styrene oxide (SO), chloroform-d (CDCl<sub>3</sub>), dimethyl sulfoxide d<sub>6</sub> (DMSO), dimethyl carbonate (DMC), hydrochloric acid (HCl), sodium hydroxide (NaOH), 2-bromoterephthalic acid (H<sub>2</sub>BDC-Br), imidazole (IM), anhydrous potassium carbonate (K<sub>2</sub>CO<sub>3</sub>), anhydrous copper sulfate (CuSO<sub>4</sub>). All the reagents are of analytical grade and used without further purification.

#### S2 Synthesis of 2-(imidazole-1-yl) terephthalic acid<sup>1-7</sup>.

A mixture of K<sub>2</sub>CO<sub>3</sub> (1.9340 g, 0.014 mol), 2-bromoterephthalic acid (1.2250 g, 0.005 mol), imidazole (1.7100 g, 0.025 mol), CuSO<sub>4</sub> (0.0500 g, 0.2 mmol) was sufficiently ground in an agate mortar. Then, the mixture was transferred into a 100 mL Teflon lined autoclave, which was sealed and heated at 200°C for 10 h. After cooling the reaction system to room temperature, the reaction mixture was dissolved in 60 mL water, and then filtered off. The green filtrate was adjusted with 6 M dilute hydrochloric acid to pH 2.0-3.0 and filtered to obtain yellow filtrate. Recrystallization from dilute

hydrochloric acid yielded colourless rod crystals of  $\text{H}_2\text{BDC} \cdot \text{IM} \cdot \text{HCl} \cdot \text{H}_2\text{O}$ .

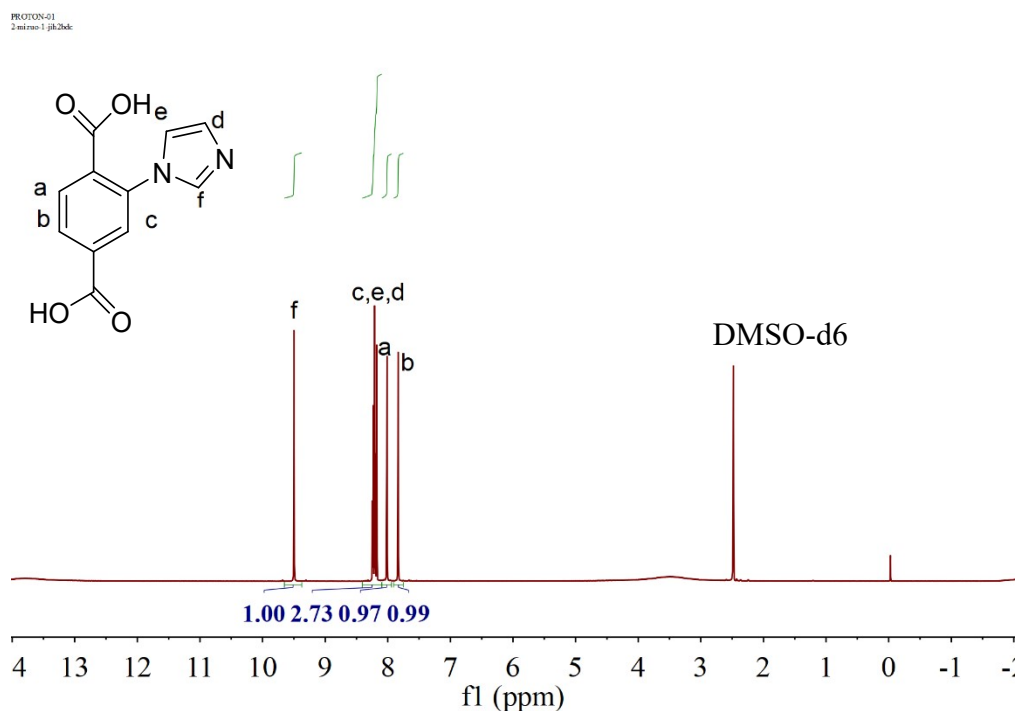

**Fig. S1**  $^1\text{H}$  NMR of  $\text{H}_2\text{BDC} \cdot \text{IM} \cdot \text{HCl} \cdot \text{H}_2\text{O}$  in  $\text{DMSO-d}_6$ .

**Table S1** Elemental analysis of  $\text{H}_2\text{BDC} \cdot \text{IM} \cdot \text{HCl} \cdot \text{H}_2\text{O}$ .

| Elements                                                                         | C [%] | N [%] | H [%] |
|----------------------------------------------------------------------------------|-------|-------|-------|
| $\text{H}_2\text{BDC} \cdot \text{IM} \cdot \text{HCl} \cdot \text{H}_2\text{O}$ | 45.73 | 9.57  | 3.831 |

The analysis results of the C, N, H elements (Table S1) are basically consistent with the theoretical values, which are C: 45.72%, N: 9.70%, H: 3.810% including H in HCl molecule and crystal water.

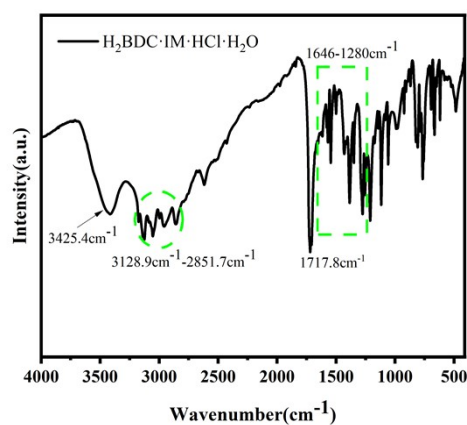

**Fig. S2** FT-IR of  $\text{H}_2\text{BDC} \cdot \text{IM} \cdot \text{HCl} \cdot \text{H}_2\text{O}$ .

As shown in Fig. S2, the absorption peak at  $3425.4\text{cm}^{-1}$  corresponds to the water-binding -OH in the ligand, the C=C expansion vibration peak on the benzene ring appears at  $3128.9\text{--}2851.7\text{ cm}^{-1}$ , the skeleton vibration peak of the benzene ring is in the range of  $1646\text{--}1280\text{ cm}^{-1}$ , and the absorption peak of the carbonyl group is at  $1717.8\text{ cm}^{-1}$ . The absorption vibration peak of imidazole appeared between  $1053\text{ and }1202\text{ cm}^{-1}$ .

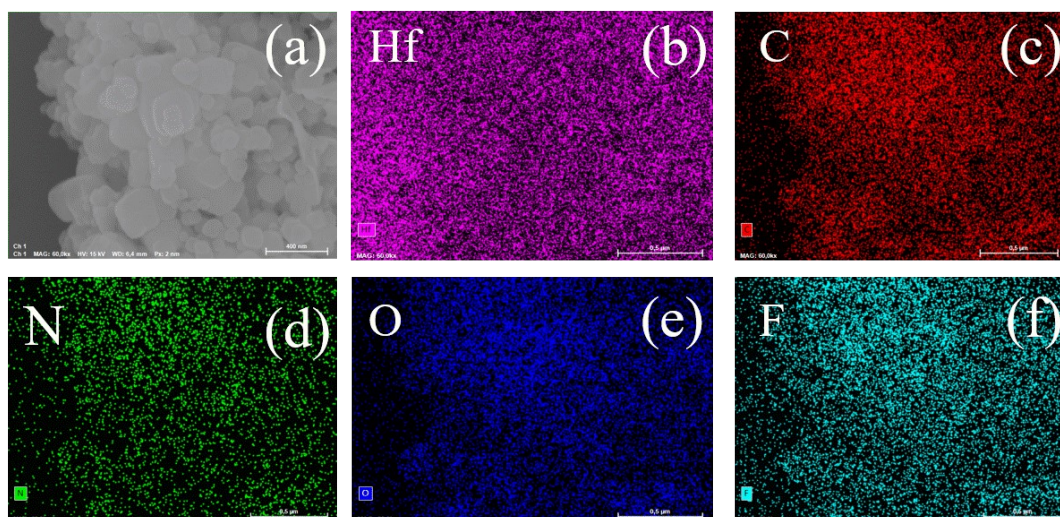

**Fig. S3** EDS-mapping of HUIN MOFs.

### S3 Calculation of activation energy<sup>8</sup>

In this paper, a rough calculation of the activation energy is performed. As known, activation energy is the energy required for a molecule to change from its normal state to an active state that is prone to chemical reactions. The activation energy is the difference between the average energy of the activated molecule and that of the reactant molecule. It is an energy barrier that needs to be overcome for a chemical reaction to occur. The general rate equation for the cycloaddition reaction can be described as Eq. (1), where  $k$  is the rate constant and  $[ECH]$ ,  $[CO_2]$ ,  $[CAT]$  are the concentrations of ECH,  $CO_2$  and catalyst, respectively;  $a$ ,  $b$  and  $c$  are the orders of the reaction. The concentration of the catalysts remained constant during each experiment, and that of  $CO_2$  remained steady throughout the reaction, and can be assumed to be constant due to continuous supplement. Therefore, Eq. (1) was simplified as Eq. (2), and  $ka = k \cdot [CO_2]^b \cdot [CAT]^c$ . Assuming pseudo-first-order dependence of the reaction on epoxide

concentration i.e.,  $a = 1$  and by combining Eqs. (2) and (5), the rate of reaction can be given as Eq. (6). By integrating Eq. (6), the obtained Eq. (7) can be used to determine the order of reaction with respect to  $[ECH]$ . The reaction rate constant ( $ka$ ) was calculated from the gradient of  $\ln[1/(1-\alpha)]$  vs. reaction time (t). And the linearity of all these plots indicates the first-order reaction kinetic for  $\text{CO}_2$  cycloaddition ( $\alpha$  representing the ECH conversion). The formulas are as follows:

Arrhenius equation :  $Ka = A \cdot \exp\left(-\frac{Ea}{RT}\right) \longrightarrow \ln Ka = -\frac{Ea}{R} \cdot \frac{1}{T} + \ln A$

$$\text{Rate} = k \cdot [ECH]^a \cdot [CO_2]^b \cdot [CAT]^c \quad (1)$$

$$\text{Rate} = ka \cdot [ECH]^a \quad (2)$$

$$\text{Where } ka = k \cdot [CO_2]^b \cdot [CAT]^c \quad (3)$$

$$\ln ka = \ln k + b \cdot \ln[CO_2] + c \cdot \ln[CAT] \quad (4)$$

$$\text{Rate} = -d[ECH]/dt \quad (5)$$

$$-d[ECH]/dt = ka \cdot [ECH] \quad (6)$$

$$-\ln[ECH] = ka \cdot t \quad (7)$$

**Table S2** HUI<sub>4</sub> MOF catalyzes the conversion of  $\text{CO}_2$  and ECH to CPC.

| t/h                           | 4      | 6      | 8      | 10     | 12     |
|-------------------------------|--------|--------|--------|--------|--------|
| ECH conversion ( $\alpha$ )/% | 13.58  | 23.90  | 31.30  | 49.00  | 45.46  |
| $\ln(1/(1-\alpha))$           | 0.1460 | 0.2731 | 0.3754 | 0.6733 | 0.6062 |

**Table S3** HUIN MOFs catalyzes the conversion of  $\text{CO}_2$  and ECH to CPC.

| t/h                           | 4      | 6      | 8      | 10     | 12     |
|-------------------------------|--------|--------|--------|--------|--------|
| ECH conversion ( $\alpha$ )/% | 53.55  | 55.95  | 64.29  | 81.64  | 79.65  |
| $\ln(1/(1-\alpha))$           | 0.7668 | 0.8198 | 1.0297 | 1.6950 | 1.5921 |

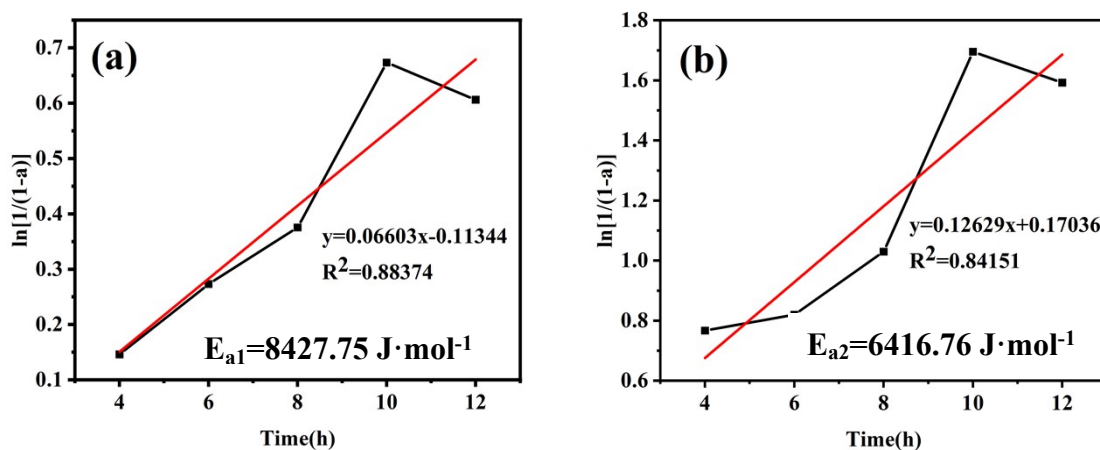

**Fig. S4**  $\ln[1/(1-\alpha)]$  linear fitting on  $t$  for HUI<sub>4</sub> (a) and HUIN (b), respectively.

In the catalytic reaction, the conversion temperature is constant with  $T=373\text{K}$ , so  $E_{a1} = 8427.75 \text{ J}\cdot\text{mol}^{-1}$ ,  $E_{a2} = 6416.76 \text{ J}\cdot\text{mol}^{-1}$  are calculated with  $E_{a1} > E_{a2}$ .

It is proved that HUIN MOF has lower activation energy than HUI<sub>4</sub> MOF, and thus displays higher ECH conversion rate.

**Table S4** Comparison of the catalytic performance of HUIN with those of previously reported MOFs for cycloaddition of CO<sub>2</sub> with ECH.

| Entry | Catalyst     | Cocatalyst | Time<br>(h) | Temperatur<br>e<br>(°C) | Pressure<br>(MPa) | Yield<br>(%) | Ref. |
|-------|--------------|------------|-------------|-------------------------|-------------------|--------------|------|
| 1     | NU-912(Hf)-I | -          | 6           | 55                      | 1                 | <5           | 9    |
| 2     | FJI-H6       | TBAB       | 60          | 25                      | 1                 | 52.6         | 10   |
| 3     | PCP-33(Mn)   | TBAB       | 12          | 80                      | 1                 | 72.27        | 11   |

|   |      |   |    |     |     |       |              |
|---|------|---|----|-----|-----|-------|--------------|
| 4 | HUIN | - | 10 | 100 | 0.1 | 76.12 | This<br>Work |
|---|------|---|----|-----|-----|-------|--------------|

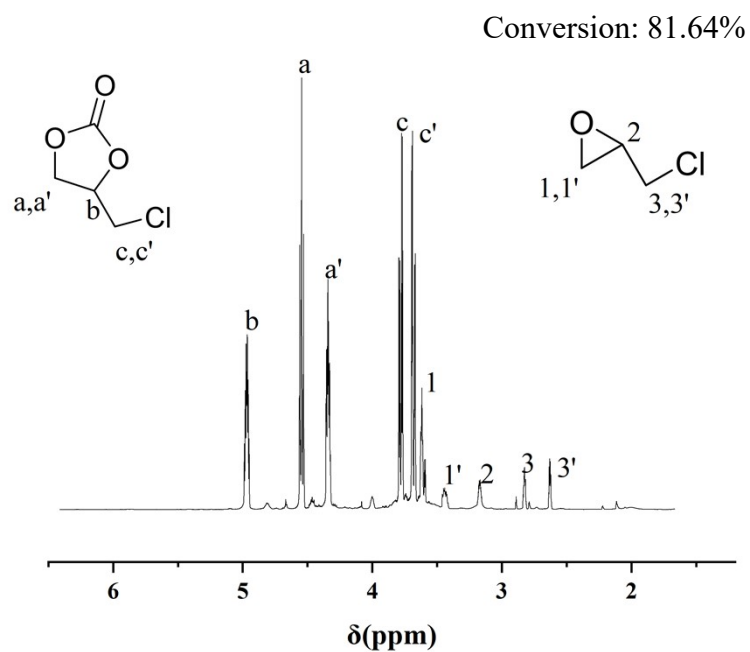

**Fig. S5**  $^1\text{H}$  NMR of ECH conversion to 4-( chloromethyl)-1,3-dioxolan 2-one.

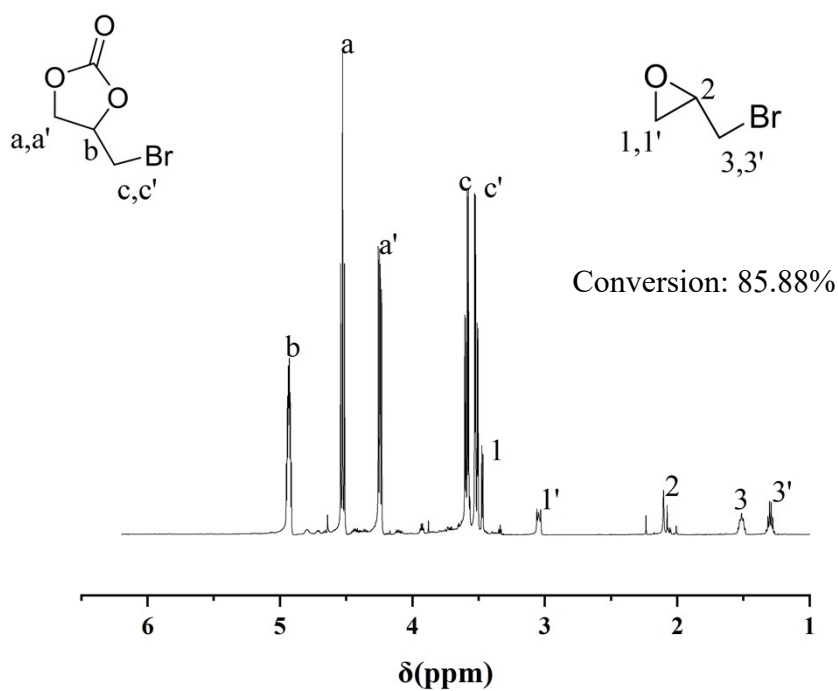

**Fig. S6**  $^1\text{H}$  NMR of EBH conversion to 4-(bromomethyl)-1,3-dioxolan-2-one.

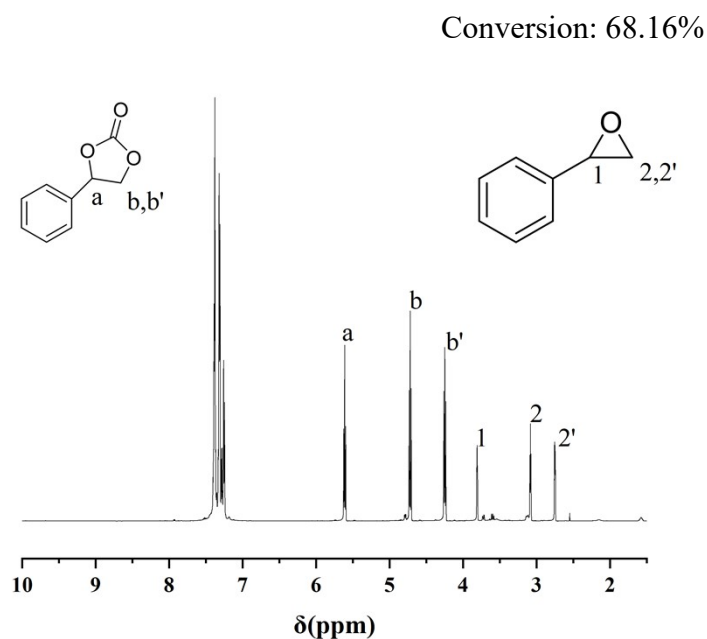

**Fig. S7**  $^1\text{H}$  NMR of SO conversion to 4-(phenyl)-1,3- dioxolan-2-one.

## Reference

1. K. H. Cui, S. Y. Yao, H. Q. Li, Y. T. Li, H. P. Zhao, C. J. Jiang and Y. Q. Tian, CrystEngComm, 2011, 13, 3432.
2. S. Gulati, S. Vijayan, S. Kumar, B. Harikumar, M. Trivedi, R. S. Varma and R. S. Varma, Coord. Chem. Rev., 2023, 474, 46.
3. F. F. Li, Y. Chen, A. J. Gao, W. J. Tong, C. C. Ji, Y. Cheng and Y. H. Zhou, New J. Chem., 2022, 46, 18418-18425.
4. X. Y. Li, Y. Z. Li, L. N. Ma, L. Hou, C. Z. He, Y. Y. Wang and Z. H. Zhu, J. Mater. Chem. A, 2020, 8, 5227-5233.
5. J. Liang, R. P. Chen, X. Y. Wang, T. T. Liu, X. S. Wang, Y. B. Huang and R. Cao, Chem. Sci., 2017, 8, 1570-1575.
6. H. Molavi, F. A. Joukani and A. Shojaei, Ind. Eng. Chem. Res., 2018, 57, 7030-7039.
7. X. Zhang, Y. L. Jiang and H. H. Fei, Chem. Commun., 2019, 55, 11928-11931.
8. A. Rehman, V. C. Eze, M. Resul and A. Harvey, J. Energy Chem., 2019, 37, 35-

- 42.
9. L. L. Wang, W. Z. Qiao, H. Liu, S. W. Li, J. Wu and H. W. Hou, *Inorg. Chem.*, 2023, DOI: 10.1021/acs.inorgchem.2c04078, 10.
  10. M. Feng, X. Zhou, X. R. Wang, P. P. Zhou, J. Y. Wang, Z. Y. Cheng and D. M. Wang, *ACS Appl. Mater. Interfaces*, 2023, 15, 11837-11844.
  11. J. Zheng, M. Wu, F. Jiang, W. Su and M. Hong, *Chem Sci*, 2015, 6, 3466-3470.
